# Supplementary material for: Predictors of Mortality in Bloodstream Infections: Pathogens, Infection Sources, and Comorbidities
Source: Research Square preprint supplement (doi:10.21203/rs.3.rs-8426546/v1), 2026-01-20
Supplement: Supplementary file 1 [file 63398d9477fa7ac59a83b86f.docx]

**Supplementary materials Table 1 Pathogenic in BSIs patients(n=3088 strains)**

| **Pathogen(G-b，n=2013,65.19%)** | **Strain** | **%** | **Pathogen (G+c,n=890，28.82%)** | **Strain** | **%** |
| --- | --- | --- | --- | --- | --- |
| *E.coli* | 979 | 31.70 | *Staphylococcus aureus* | 282 | 9.13 |
| *K.pneumoniae* | 376 | 12.18 | *Enterococcus faecium* | 121 | 3.92 |
| *Acinetobacter baumannii* | 115 | 3.72 | *S.epidermidis* | 110 | 3.56 |
| *P. aeruginosa* | 114 | 3.69 | *Streptococcus spp.* | 69 | 2.23 |
| *Enterobacter cloacae* | 84 | 2.72 | *Streptococcus pneumoniae* | 45 | 1.46 |
| *Brucella melitensis* | 77 | 2.49 | *Enterococcus faecalis* | 45 | 1.46 |
| *Enterobacter aerogenes* | 58 | 1.88 | *Staphylococcus hominis* | 27 | 0.87 |
| *Citrobacter freundii* | 20 | 0.65 | *Staphylococcus haemolyticus* | 23 | 0.74 |
| *Proteus mirabilis* | 19 | 0.62 | *Streptococcus anginosus* | 20 | 0.65 |
| *Serratia marcescens* | 12 | 0.39 | *Streptococcus pyogenes* | 14 | 0.45 |
| *Stenotrophomonas maltophilia* | 12 | 0.39 | *Streptococcus sanguinis* | 10 | 0.32 |
| *Morganella morganii* | 11 | 0.36 | *Streptococcus constellatus* | 9 | 0.29 |
| *Aeromonas hydrophila* | 10 | 0.32 | *Streptococcus gordonii* | 9 | 0.29 |
| *Raoultella planticola* | 9 | 0.29 | Other G+c | 106 | 3.43 |
| *Salmonella Stanley* | 8 | 0.26 | **Anaerobic and G+b bacteria(n=102,2.61%)** | **Strain** | **%** |
| *Aeromonas caviae* | 8 | 0.26 | *Bacteroides fragilis* | 15 | 0.49 |
| *Salmonella group* | 7 | 0.23 | *F.nucleatum* | 10 | 0.32 |
| *Burkholderia cepacia* | 6 | 0.19 | *Clostridium fusiforme* | 10 | 0.32 |
| *Salmonella ser. Typhi* | 6 | 0.19 | *Propionibacterium pustulosum* | 5 | 0.16 |
| *Haemophilus influenzae* | 5 | 0.16 | B. thetaiotaomicron | 5 | 0.16 |
| Other G-b | 77 | 2.49 | *Veyrococcus* | 4 | 0.13 |
| **Fungus(n=83,2.67%)** | **Strain** | **%** | *Bacillus cereus* | 4 | 0.13 |
| *Candida albicans* | 35 | 1.13 | *P. asaccharolyticus* | 3 | 0.1 |
| *Candida tropicalis* | 15 | 0.49 | *Clostridium perfringens* | 3 | 0.1 |
| *Candida glabrata* | 10 | 0.32 | *Micromonas* | 3 | 0.1 |
| *Candida parapsilosis* | 9 | 0.29 | *P.anaerobius* | 3 | 0.1 |
| *Candida spp.* | 5 | 0.16 | *Bacillus licheniformis* | 3 | 0.1 |
| *Candida famata* | 3 | 0.1 | *Actinomyces odontolyticus* | 3 | 0.1 |
| *Cryptococcus neoformans* | 2 | 0.06 | *C. difficile* | 2 | 0.06 |
| *Trichosporon asahii* | 1 | 0.03 | *C.subterminale* | 2 | 0.06 |
| *Fusarium genus* | 1 | 0.03 | *Bacteroides ovatus* | 2 | 0.06 |
| *Cryptococcus laurentii* | 1 | 0.03 | *Cl.histolyticum* | 2 | 0.06 |
| *Candida utilis* | 1 | 0.03 | Other bacteria | 23 | 0.06 |

**Supplementary materials Table 2 Underlying disease and infection sources in BSIs patients(cases)**

| Underlying disease | Cases（n%） | Mortality（%） | Infection sources, cases (n.%) | | | | | | | | |
| --- | --- | --- | --- | --- | --- | --- | --- | --- | --- | --- | --- |
| UTIs BSIs | Gallbladder and bile duct infection | CABSIs | Pulmonary infection | Abdominal BSIs s | Enterogenic BSIs | SSTIs BSIs | Liver abscess | others |
| Uremia | 170(6.10) | 16.18 | 12(7.06) | 4(2.35) | 109(64.12) | 21(12.35) | 4(2.35) | 3(1.76) | 7(4.12) | 1(0.59) | 7(5.30) |
| Gallstones and cholecystitis | 162(5.81) | 18.13 | 4(2.47) | 113(69.75) | 2(1.23) | 4(2.47) | 7(4.32) |  |  | 24(14.81) | 8(4.94) |
| Diabetes | 125(4.48) | 19.4 | 52(41.60) | 4(3.20) | 5(4.00) | 17(13.6) | 3(2.40) | 5(4.00) | 16(12.80) | 22(17.60) | 1(0.80) |
| Cirrhosis | 101(3.62) | 32.67 | 5(4.95) | 12(11.88) | 7(6.93) | 8(7.92) | 41(40.59) | 18(17.82) | 1(0.99) | 2(1.98) | 7(6.93) |
| Acute cerebrovascular disease | 99(3.55) | 46.46 | 21(21.21) | 4(4.04) | 17(17.17) | 29(29.29) |  | 6(6.06) | 2(0.02) |  | 20(20.20) |
| Traumatic craniocerebral injury | 85(3.05) | 42.86 | 6(7.06) | 1(1.18) | 10(11.76) | 37(43.53) |  | 4(4.71) | 4(4.71) |  | 23(27.06) |
| Infective endocarditis | 82(2.94) | 25.61 | 1(1.22) |  | 5(6.10) | 2(2.44) | 1(1.22) |  | 1(1.22) | IE70(85.37) | 4(4.88) |
| Severe acute pancreatitis | 75(2.69) | 26.67 | 2(2.67) | 23(30.67) | 10(13.33) | 6(8.00) | 22(29.33) | 3(4.00) |  | 1(1.33) | 8(10.67) |
| Ureteral and renal stones | 70(2.51) | 10 | 69(98.57) |  |  |  |  |  |  |  | 1(1.43) |
| Multiple trauma | 68(2.44) | 38.24 | 3(4.41) | 1(1.47) | 10(14.71) | 19(27.94) | 11(16.18) | 4(5.88) | 15(20.06) |  | 5(7.35) |
| Prostatic hyperplasia | 61(2.19) | 8.2 | 59(69.72) | 1(1.64) |  |  |  |  |  | 1(1.64) |  |
| Brucellosis | 57(2.04) | 3.51 | 2 | 2 |  | 1 | 3 | Lumbar（13） | | IE 5 | 31 |
| Cerebral infarction | 52(1.86) | 44.23 | 16(30.77) | 1(1.92) | 7(13.46) | 18(34.62) |  |  | 2(3.58) | 2(3.58) | 6(11.54) |
| Autoimmune system diseases | 51(1.83) | 23.53 | 4 | 3 | 8 | 5 | 5 | 4 | 9 |  | 13 |
| Bile duct stones and cholangitis | 49(1.76) | 10.2 | 1 | 43(87.76) | 1 |  | 1 |  |  | 3 |  |
| Other diseases | 635(22.76) | 29.29 | 78(12.28) | 26(4.09) | 56(8.82) | 67(10.55) | 36(5.67) | 58(9.13) | 48(7.56) | 18(2.83) | 208(32.76) |
| Malignant hematonosis | 408(14.63) | 50 | 20(4.90) | 10(2.45) | 30(7.35) | 59(14.46) | 10(2.45) | 69(16.91) | 20(4.90) | 2(0.49) | 198(48.53) |
| ALL | 109(3.91) | 45.87 | 3(2.75) | 2(1.83) | 9(8.26) | 19(17.43) | 2(1.83) | 13(11.93) | 4(3.67) |  | 57(52.29) |
| ANLL | 98(3.51) | 46.94 | 2(2.04) |  | 10(10.20) | 7(7.14) | 2(2.04) | 21(21.43) | 8(8.16) |  | 48(48.93) |
| AML | 41(1.47) | 31.71 | 4(9.76) | 1(2.44) | 1(2.44) | 8(19.51) | 0 | 8(19.51) | 1(2.44) |  | 18(43.90) |
| AA | 39(1.40) | 61.54 | 2(5.13) | 0 | 1(2.56) | 4(10.26) | 1(2.56) | 8(20.51) | 5(12.82) | 1(2.56) | 17(43.59) |
| Other malignant hematonosis | 135(4.84) | 42.22 | 10(7.41) | 8(5.93) | 9(6.67) | 20(14.81) | 6(4.44) | 20(14.81) | 4(2.96) |  | 58(42.96) |
| Cancers | 434(15.56) | 46.95 | 64(14.75) | 98(22.58) | 20(4.16) | 27(6.22) | 52(11.98) | 75(17.28) | 9(2.07) | 17(3.92) | 72(16.59) |
| Rectal cancer | 62(2.22) | 45.16 | 8(12.90) | 5(8.06) | 2(3.23) | 2(3.23) | 14(22.58) | 26(41.91) | 1(1.61) | 1(1.61) | 2(3.23) |
| Cholangiocarcinoma | 59(2.12) | 47.46 | 1(1.69) | 49(83.05) | 1(1.69) |  | 6(10.17) |  |  | 1(1.69) | 1(1.69) |
| Gastric cancer | 52(1.86) | 63.46 | 4(7.69) | 7(13.46) | 2(3.85) | 5(9.62) | 10(19.23) | 20(38.46) |  | 1(1.92) | 3(5.77) |
| Liver cancer | 50(1.79) | 46.81 | 3(6.00) | 8(16.00) | 1(2.00) |  | 14(28.00) | 4(8.00) | 2(4.00) | 10(20.00) | 8(16.00) |
| Pancreatic cancer | 40(1.43) | 52.5 |  | 12(30.00) | 1(2.50) |  | 4(10.00) | 6(15.00) |  | 3(7.50) | 14(35.00) |
| Other malignant tumors | 174(6.24) | 39.08 | 46(26.44) | 18(10.34) | 13(7.47) | 23(13.22) | 4(2.30) | 12(6.90) | 6(3.45) | 1(0.57) | 42(24.14) |

Abbreviations: UTIs: urinary tract infections; CABSIs: catheter-associated bloodstream infections; SSTIs: skin and soft tissue infections;IE:Infective endocarditis; ALL:acute lymphoblastic leukemia; ANLL: acute non-lymphocytic leukemia; AML：acute myeloid leukemia；AA :aplastic anemia

.
